# Supplementary material
Source: PubMed Central journal article supplement (PMC3674051)
Supplement: epi-8-421-s01.pdf [file epi-8-421-s01.pdf]

## **Supplemental Material to:**

**Yudong Xia, Junwen Wang, Huijuan Luo, Zhaowei Gao, Xu Han, Juyong Zhang, Xiao-Jun Huang, Yu Yao, Hanlin Lu, Na Yi, Baojin Zhou, Zhilong Lin, Bo Wen, Huanming Yang, Xiuqing Zhang, Jun Wang and Fei Gao**

**Integrated detection of both 5-mC and 5-hmC by high-throughput tag sequencing technology highlights methylation reprogramming of bivalent genes during cellular differentiation**

**Epigenetics 2012; 8(4)**

**<http://dx.doi.org/10.4161/epi.24280>**

**<http://www.landesbioscience.com/journals/epigenetics/article/24280/>**

## Supplementary Files

Figure S1

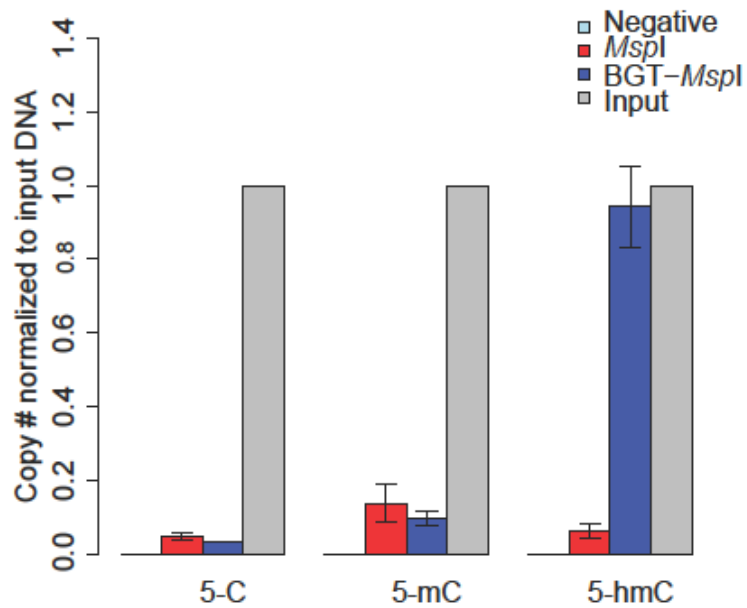

**Figure S1. Real-time QPCR analysis of *MspI* and *HpaII* sensitivity to glucosylation of 5-hmC.**

Double stranded oligonucleotides containing either a single 5-hmC, 5-mC or 5-C residue within the *MspI* recognition site on both strands are either first glucosylated and then digested by *MspI* (BGT-*MspI*) or directly digested by *MspI*. Two types of controls were set, in which no oligonucleotides are included in negative controls (Negative) while no *MspI* enzyme is included in "Input" controls. All data with values of mean  $\pm$ s.d. from three independent experiments are normalized to "Input" controls.

**Figure S2**

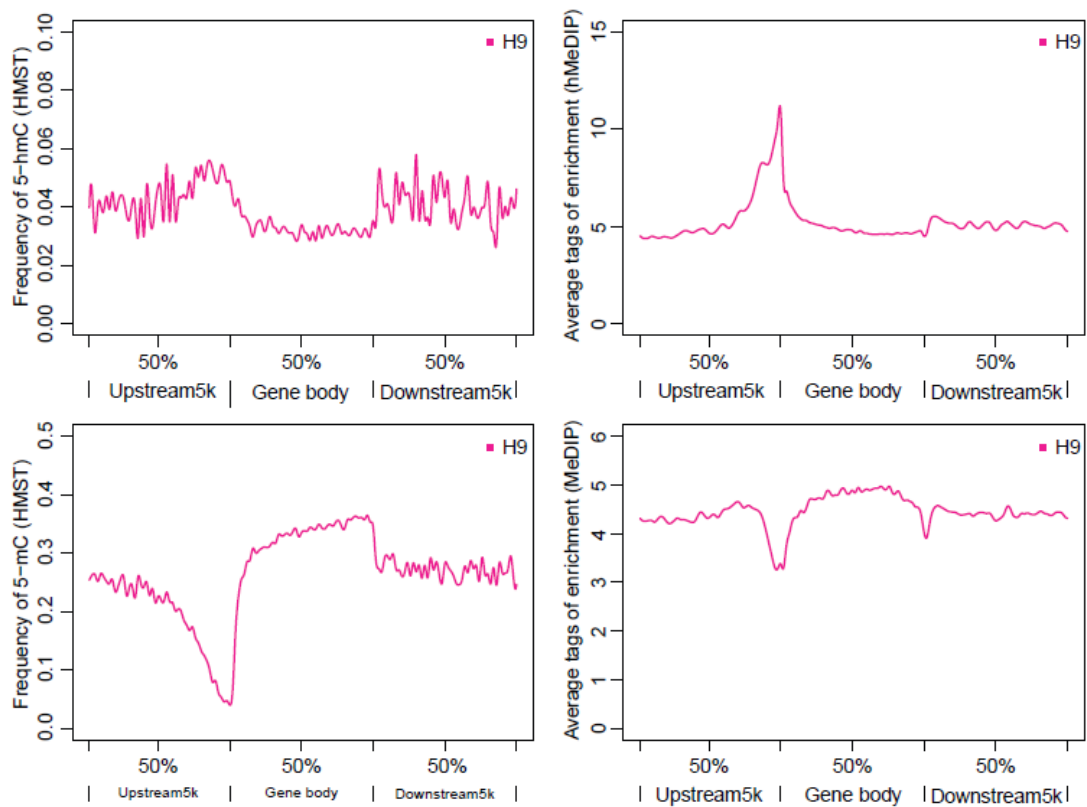

**Figure S2. Distribution of DNA hydroxymethylation or methylation in genic regions generated by HMST-seq or (h)MeDIP in H9 hESCs.**

Frequency of 5-hmC (top left) or 5-mC (bottom left), and average tags enriched by hMeDIP (top right) or MeDIP (bottom right) in genic regions are presented, where 5kb upstream region from transcription start site (TSS), gene body and 5kb downstream region from transcription end site (TES) were equally divided into 50 windows separately.

**Figure S3**

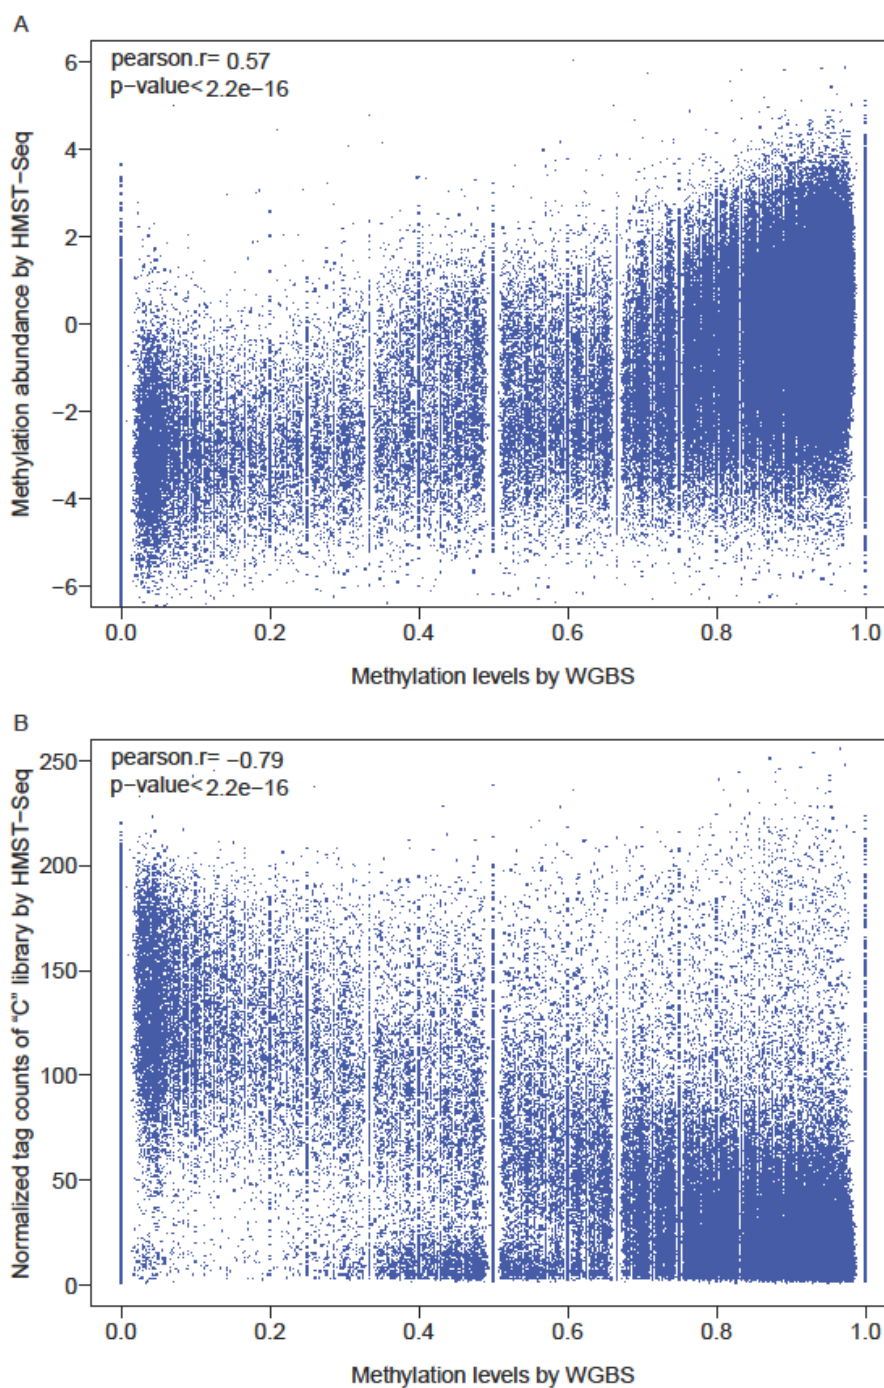

**Figure S3. Pair-wise comparison of methylation levels detected by WGBS and methylation levels deduced by HMST-Seq.**

(A). Scatter analysis for methylation levels detected by WGBS and methylation abundance deduced by HMST-Seq. The methylation abundance was determined as the ratio between tag counts of "C+mC" and "C" libraries. (B). Scatter analysis for methylation levels detected by WGBS and normalized tag counts of "C" library by HMST-Seq. Pearson correlation coefficients and *P*-values are provided.

**Figure S4**

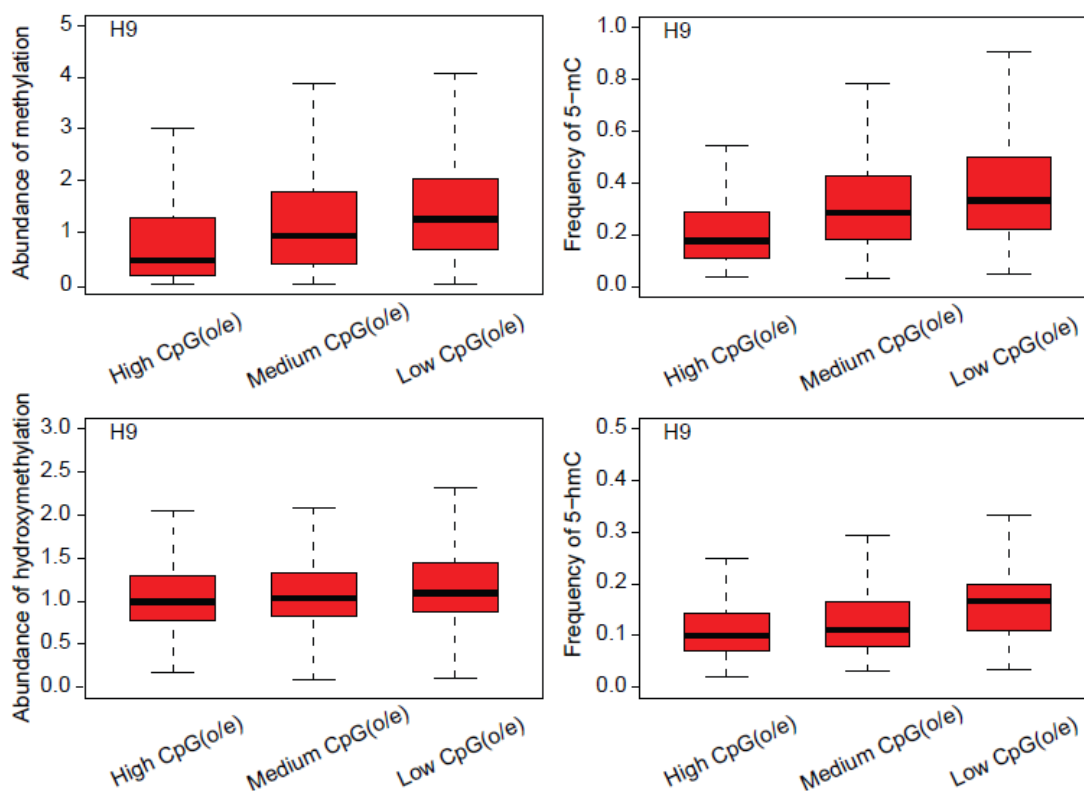

**Figure S4. Boxplots of methylation or hydroxymethylation abundances characterized by CpG density in H9 hESCs.**

Boxplots of methylation or hydroxymethylation abundances of 10kb windows across the genome that contain at least one 5-mC site (top) or 5hmC site (bottom) are showed. These windows are classified as high (Observed/expected ratio $\leq$  0.3), medium (Observed/expected ratio $>$  0.3 and Observed/expected ratio $\leq$  0.5) and low (Observed/expected ratio $>$  0.5) CpG density.

**Figure S5**

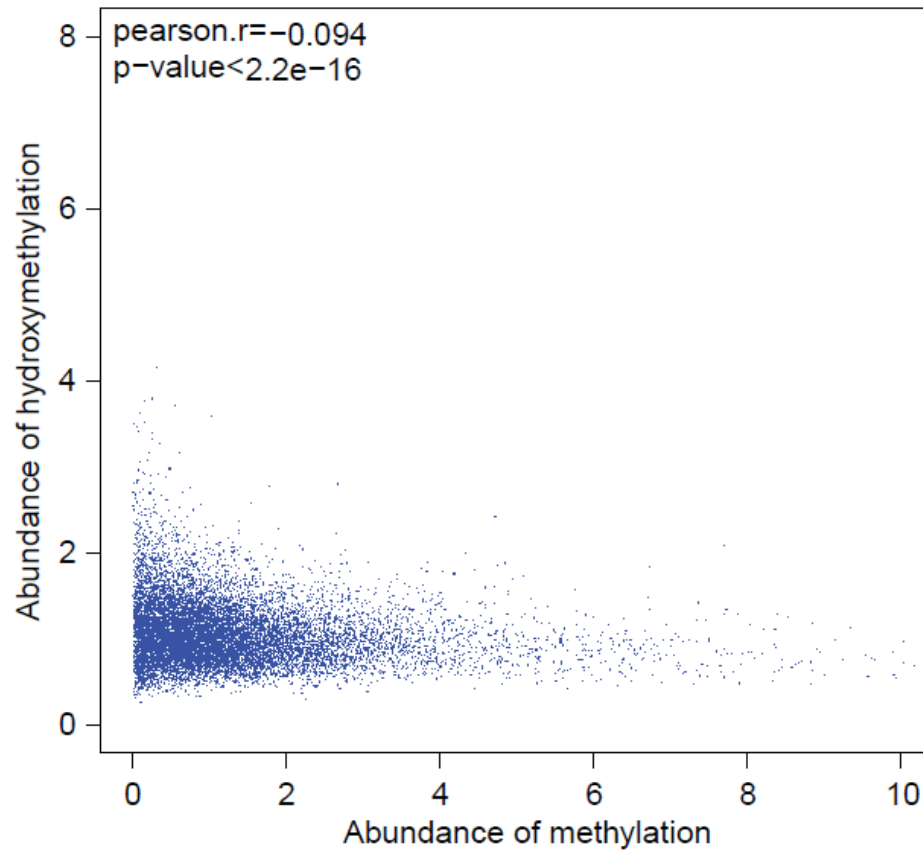

**Figure S5. Correlation analysis of abundances of methylation and hydroxymethylation at CCGG sites.**

Scatter analysis for the abundances of methylation and hydroxymethylation at CCGG sites in H9 ESCs is performed, in which Pearson correlation coefficients and *P*-value are provided.

**Figure S6**

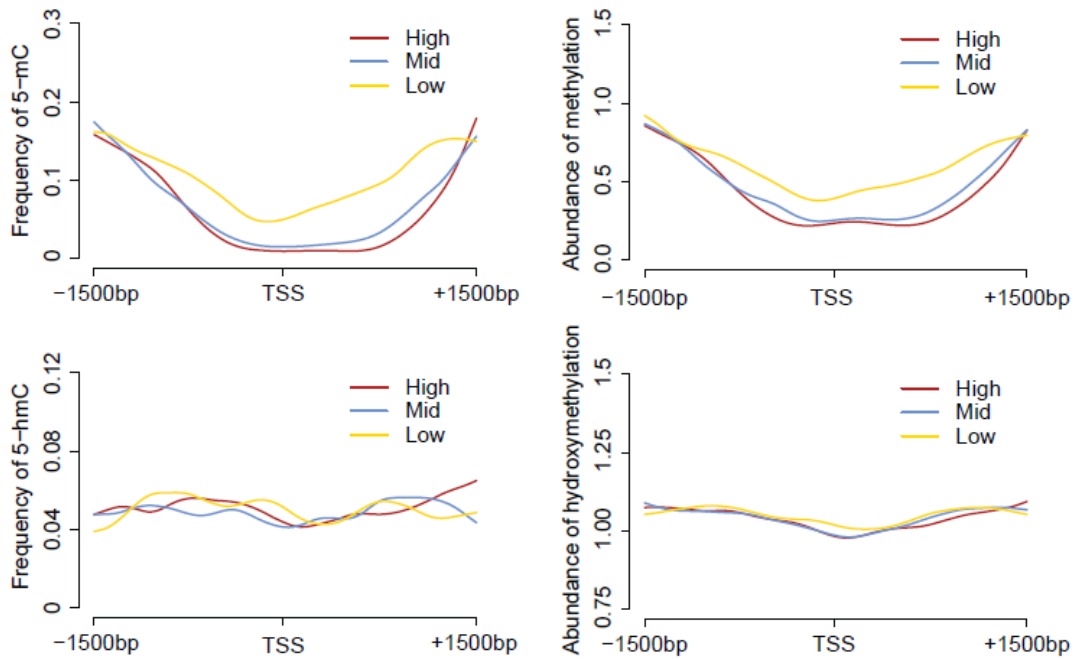

**Figure S6. Association between DNA methylation or hydroxymethylation and gene expression in H9 cells.**

Frequency of 5-mC or 5-hmC around TSS of lowly (yellow,  $TPM \leq 0.01$ ), moderately (blue,  $0.01 < TPM \leq 2.70$ ) or highly (red,  $TPM > 2.70$ ) expressed genes, which are equally classified by their expression levels. The  $\pm 1500$ bp around transcription start sites are equally divided into 100 windows.

**Figure S7**

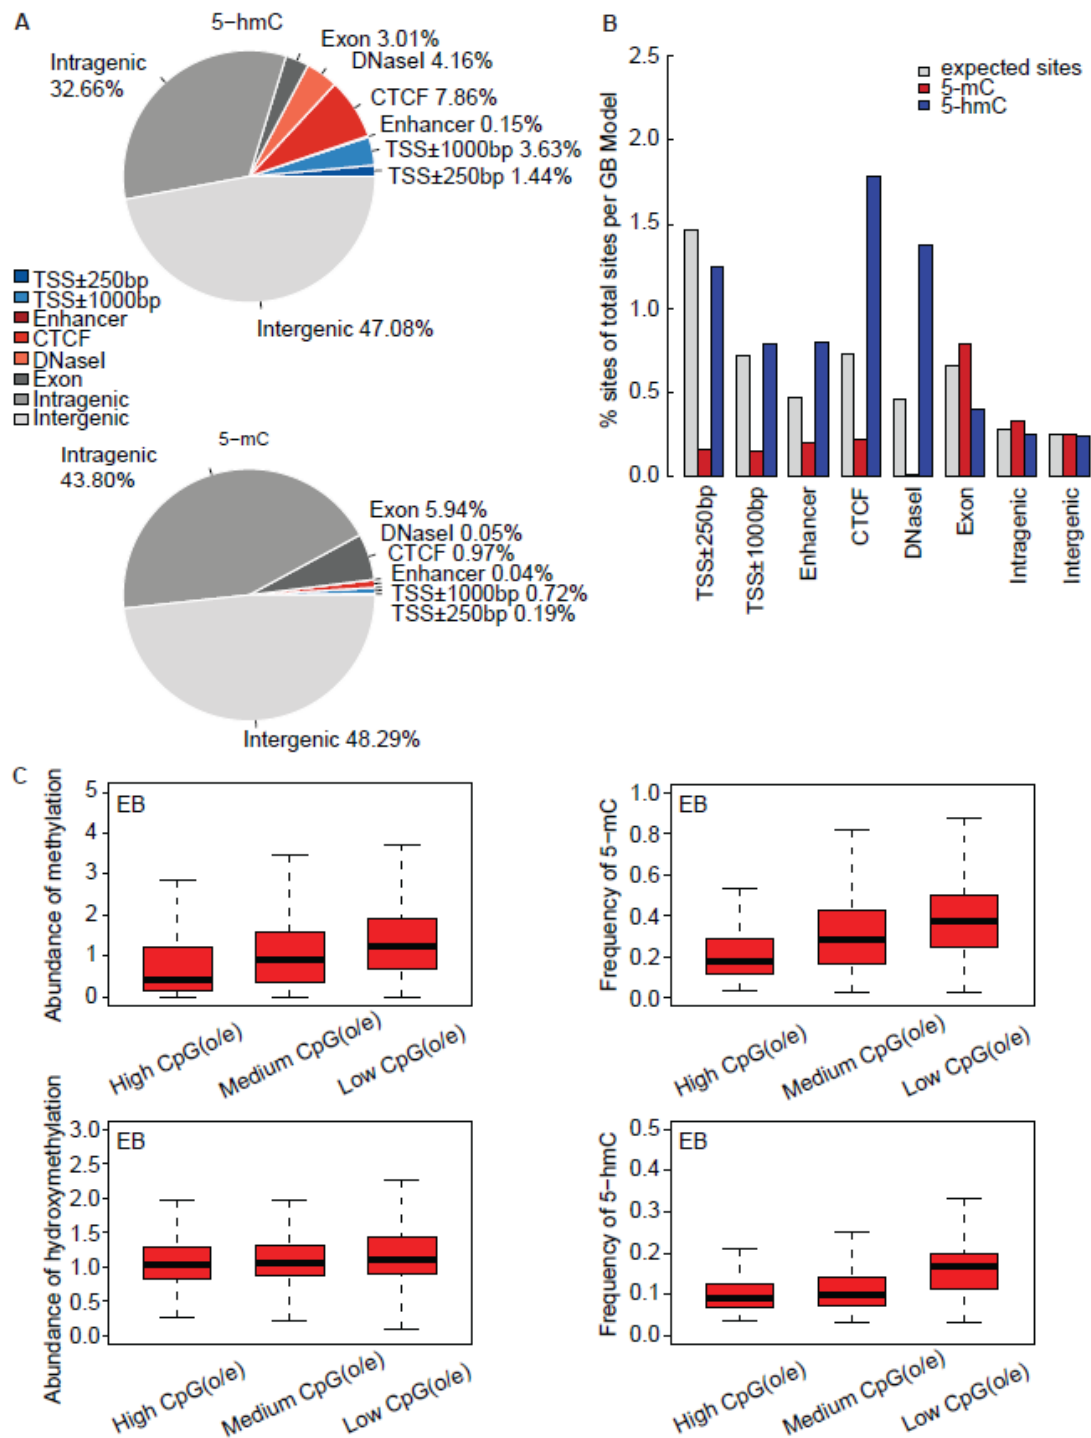

**Figure S7. Genomic distribution of 5-mC and 5hmC sites in EBs.**

(A). Overlap of 5-hmC and 5-mC with genomic regions. Genic features were extracted from the UCSC hg19 database. Regulatory elements (CTCF and DNase I) were download from previously published data generated by CHIP-Seq and DNase-Seq experiments and enhancer were download from VISTA Enhancer Browser database.



Each 5-hmC or 5-mC site is counted once: the cytosines located in previous regions are excluded counterclockwise from TSS $\pm$ 250bp. Blue: promoter-proximal elements; Red: distal-regulatory elements; Gray: genic regions and intergenic regions. (B). Relative enrichment of modified sites within several genomic elements. The observed percentage of 5-mC (red) or 5-hmC (blue) counts within these genomic elements out of all modified CCGG sites in human genome and the expected percentage of CCGG counts (gray) within these genomic elements out of all CCGG counts in human genome are presented. All values of counts were normalized to the length of each region (per Gb). (C). Boxplots of methylation or hydroxymethylation abundances of 10kb windows across the genome that contain at least one 5-mC site (top) or 5hmC site (bottom) are showed. These windows are classified as high (Observed/expected ratio $\leq$  0.3), medium (Observed/expected ratio $>$  0.3 and Observed/expected ratio $\leq$  0.5) and low (Observed/expected ratio $>$  0.5) CpG density.

**Figure S8**

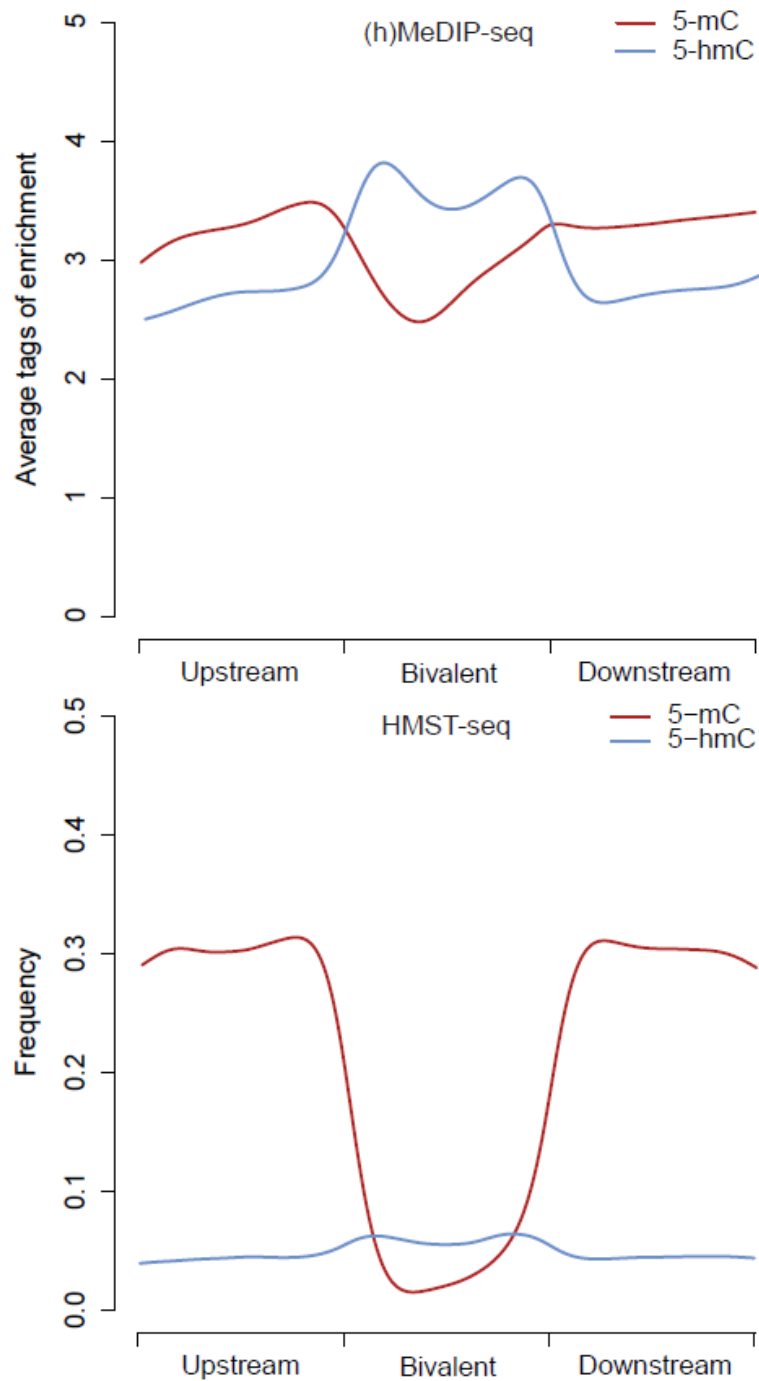

**Figure S8. Distribution of methylation and hydroxymethylation around genomic regions with bivalent marks in H9 ESCs.**

Distribution of methylation (red) and hydroxymethylation (blue) generated by HMST-seq (bottom) or (h)MeDIP-seq (top) around bivalent regions that contain both H3K4me3 and H3K27me3 marks. The bivalent regions and their upstream and downstream regions are equally divided into 50 windows separately.

Supplementary Table S1. Control DNA sequence and associated primers information of Q-PCR assay for efficacy of glucosyla

control DNA 5'-CAGTGAAGTTGGCAGACTGAGCCAGGTCCCACAGATGCAGTGA**CCGG**AGTCATTGCCAAACTCTGCA  
GGAGAGCAAGGGCTGTCTATAGGTGGCAAGTCA-3'  
3'-GTCACTTCAACCGTCTGACTCGGTCCAGGGTGTCTACGTCACT**GGCCT**CAGTAACGGTTTGAGACGT  
CCTCTCGTTCCCGACAGATATCCACCGTTCAGT-5'  
FW primer 5'- CAGTGAAGTTGGCAGACTGAGC -3'  
REV primer 5'- CTGACTTGCCACCTATAGACAGC -3'

Supplementary Table S2. Copy numbers of control DNA with different modification after MspI digestion detected by Q-PCR assay.

|          | 5C (Mean±SD)      | 5mC (Mean±SD)     | 5hmC (Mean±SD)    |
|----------|-------------------|-------------------|-------------------|
| Negative | 6.58E-05±9.35E-05 | 7.09E-05±1.02E-04 | 2.45E-05±3.50E-05 |
| MspI     | 4.64E-02±8.93E-03 | 1.38E-01±5.27E-02 | 6.29E-02±1.78E-02 |
| BGT-MspI | 3.20E-02±5.49E-04 | 9.57E-02±1.85E-02 | 9.43E-01±1.09E-01 |
| Input    | 1                 | 1                 | 1                 |

Supplementary Table S3. Data summary and repeatability of replicates

| Replicate | Sample | Library    | Total reads | Clean reads | Clean rate | Accepted reads | Accepted rate | Average informative tags | Informative sites | Average depth | Replicates correlation (R <sup>2</sup> ) | Replicates correlation (p-value) |
|-----------|--------|------------|-------------|-------------|------------|----------------|---------------|--------------------------|-------------------|---------------|------------------------------------------|----------------------------------|
| 1         | H9     | "C"        | 66,500,038  | 61,346,150  | 92.25%     | 40,235,240     | 65.59%        | 36,750,132               | 1,119,146         | 32.84         | 0.92                                     | <2.2e-16                         |
| 2         | H9     | "C"        | 81,725,204  | 76,757,324  | 93.92%     | 41,515,419     | 54.09%        |                          |                   |               |                                          |                                  |
| 1         | H9     | "C+mC"     | 70,109,727  | 64,723,835  | 92.32%     | 35,280,109     | 54.51%        | 32,832,035               | 1,378,153         | 23.82         | 0.81                                     | <2.2e-16                         |
| 2         | H9     | "C+mC"     | 92,136,726  | 86,747,336  | 94.15%     | 43,316,899     | 49.93%        |                          |                   |               |                                          |                                  |
| 1         | H9     | "C+mC+hmC" | 67,791,420  | 62,338,830  | 91.96%     | 34,610,284     | 55.52%        | 29,712,569               | 1,368,519         | 21.71         | 0.71                                     | <2.2e-16                         |
| 2         | H9     | "C+mC+hmC" | 91,776,060  | 86,459,211  | 94.21%     | 36,341,900     | 42.03%        |                          |                   |               |                                          |                                  |
| 1         | EB     | "C"        | 66,030,587  | 61,327,289  | 92.88%     | 34,641,227     | 56.49%        | 34,355,941               | 1,157,123         | 29.69         | 0.93                                     | <2.2e-16                         |
| 2         | EB     | "C"        | 81,669,796  | 76,886,385  | 94.14%     | 42,068,546     | 54.72%        |                          |                   |               |                                          |                                  |
| 1         | EB     | "C+mC"     | 91,215,821  | 87,130,009  | 95.52%     | 52,026,070     | 59.71%        | 42,098,840               | 1,376,473         | 30.58         | 0.96                                     | <2.2e-16                         |
| 2         | EB     | "C+mC"     | 92,995,981  | 87,646,708  | 94.25%     | 49,187,305     | 56.12%        |                          |                   |               |                                          |                                  |
| 1         | EB     | "C+mC+hmC" | 84,358,222  | 78,275,663  | 92.79%     | 47,450,979     | 60.62%        | 35,653,132               | 1,361,478         | 26.19         | 0.90                                     | <2.2e-16                         |
| 2         | EB     | "C+mC+hmC" | 94,716,146  | 88,968,269  | 93.93%     | 38,299,920     | 43.05%        |                          |                   |               |                                          |                                  |

Supplementary Table S4. UPLC–MS/MS analysis of global DNA methylation and hydroxymethylation

| Sample | Calculated Concentration of mdC | Calculated Concentration of hmdC | Calculated Concentration of dG | Percentage of 5-mC (mdC/dG) | Adjusted percentage of 5-mCG* (mCG/CG) | Percentage of 5-mC by HMST-Seq | Percentage of 5-hmCG (hmdC/dG) | Adjusted percentage of 5-hmCG* (hmCG/CG) | Percentage of 5-hmC by HMST-Seq |
|--------|---------------------------------|----------------------------------|--------------------------------|-----------------------------|----------------------------------------|--------------------------------|--------------------------------|------------------------------------------|---------------------------------|
| EB     | 1.51E-07                        | 4.77E-09                         | 4.92E-06                       | 3.07%                       | 63.45%                                 | 31.37%                         | 0.10%                          | 2.00%                                    | 1.95%                           |
| H9     | 1.07E-07                        | 5.67E-09                         | 3.87E-06                       | 2.77%                       | 57.25%                                 | 28.47%                         | 0.15%                          | 3.03%                                    | 3.28%                           |

\* As methylation and hydroxymethylation mainly occur at CG sites, correcting computed percentage of 5-mCG or 5-hmCG can be defined as: (mdC/dG)\*(number of G sites)/(number of CG sites) or (hmdC/dG)\*(number of G sites)/(number of CG sites)

Number of CG: 57400172

Number of G: 1186291952

Supplementary Table S5. Digital gene expression levels of DNMTs and TETs in H9 hESCs and EBs

| Gene   | H9 (TPM) | EB (TPM) |
|--------|----------|----------|
| DNMT1  | 62.89    | 53.13    |
| DNMT3A | 81.73    | 89.66    |
| DNMT3B | 613.08   | 528.14   |
| DNMT3L | 0.85     | 0.86     |
| TET1   | 56.41    | 58.67    |
| TET2   | 9.81     | 9.10     |
| TET3   | 12.64    | 14.14    |

Supplementary Table S6. Gene expression levels of DMRs- or DhMRs-associated genes

| chr   | DMR start   | DMR end     | # of CCGG | H9 abundance | EB abundance | p-value  | Symbol    | H9 TPM | EB TPM | Hyper-expressed sample | Bivalent gene |
|-------|-------------|-------------|-----------|--------------|--------------|----------|-----------|--------|--------|------------------------|---------------|
| chr1  | 15,736,141  | 15,736,551  | 5         | 0.32         | 0.10         | 3.17E-02 | EFHD2     | 26.40  | 31.67  | NA                     | bivalent      |
| chr1  | 36,022,701  | 36,023,567  | 6         | 0.41         | 0.17         | 4.33E-03 | NCDN      | 22.22  | 20.05  | NA                     | bivalent      |
| chr1  | 36,022,701  | 36,023,567  | 6         | 0.41         | 0.17         | 4.33E-03 | KIAA0319L | 75.25  | 60.64  | NA                     | bivalent      |
| chr1  | 38,511,999  | 38,512,488  | 6         | 0.43         | 0.15         | 2.16E-03 | POU3F1    | 6.60   | 8.3    | NA                     | bivalent      |
| chr1  | 40,781,764  | 40,783,132  | 6         | 0.47         | 0.16         | 4.11E-02 | COL9A2    | 7.61   | 13.84  | NA                     | bivalent      |
| chr1  | 154,971,941 | 154,973,595 | 6         | 0.42         | 0.14         | 1.52E-02 | ZBTB7B    | 16.19  | 22.26  | NA                     | bivalent      |
| chr1  | 182,991,805 | 182,993,133 | 5         | 0.47         | 0.20         | 1.59E-02 | LAMC1     | 41.74  | 53.69  | NA                     | NA            |
| chr10 | 81,366,471  | 81,368,967  | 5         | 0.75         | 1.12         | 1.59E-02 | SFTPA1    | NA     | NA     | NA                     | NA            |
| chr10 | 102,891,280 | 102,891,552 | 5         | 0.38         | 0.13         | 1.59E-02 | TLX1      | 0.01   | 0.12   | NA                     | NA            |
| chr10 | 102,891,280 | 102,891,552 | 5         | 0.38         | 0.13         | 1.59E-02 | TLX1NB    | NA     | NA     | NA                     | NA            |
| chr10 | 104,676,924 | 104,679,412 | 6         | 0.39         | 0.17         | 2.60E-02 | CNNM2     | 3.22   | 3.51   | NA                     | bivalent      |
| chr10 | 123,357,621 | 123,358,240 | 5         | 0.34         | 0.13         | 3.17E-02 | FGFR2     | 58.49  | 57.5   | NA                     | bivalent      |
| chr11 | 35,965,004  | 35,965,712  | 5         | 0.33         | 0.12         | 3.17E-02 | LDLRAD3   | 14.16  | 24.48  | NA                     | bivalent      |
| chr12 | 121,479,798 | 121,482,801 | 5         | 0.73         | 1.08         | 3.17E-02 | OASL      | NA     | NA     | NA                     | NA            |
| chr12 | 122,150,344 | 122,151,517 | 5         | 0.45         | 0.21         | 3.17E-02 | TMEM120B  | 12.47  | 15.87  | NA                     | bivalent      |
| chr12 | 133,194,982 | 133,196,658 | 5         | 0.38         | 0.14         | 3.17E-02 | P2RX2     | 3.27   | 3.14   | NA                     | NA            |
| chr13 | 41,238,886  | 41,241,600  | 6         | 0.34         | 0.09         | 1.52E-02 | FOXO1     | 35.71  | 25.09  | NA                     | NA            |
| chr14 | 94,392,707  | 94,393,816  | 5         | 1.50         | 0.72         | 3.17E-02 | C14orf86  | NA     | NA     | NA                     | NA            |
| chr14 | 103,563,704 | 103,567,024 | 9         | 0.80         | 0.36         | 5.64E-03 | C14orf73  | NA     | NA     | NA                     | NA            |
| chr15 | 65,066,703  | 65,070,250  | 7         | 0.36         | 0.12         | 1.11E-02 | RBPMS2    | 106.33 | 140.46 | NA                     | bivalent      |
| chr15 | 90,358,931  | 90,363,985  | 5         | 0.62         | 1.22         | 3.17E-02 | ANPEP     | 0.56   | 0.49   | NA                     | bivalent      |
| chr15 | 91,471,413  | 91,474,066  | 6         | 2.45         | 1.39         | 4.11E-02 | UNC45A    | 40.89  | 41.14  | NA                     | bivalent      |
| chr16 | 572,491     | 574,652     | 5         | 2.23         | 1.02         | 3.17E-02 | SOLH      | 31.36  | 29.09  | NA                     | bivalent      |
| chr16 | 734,710     | 736,058     | 5         | 3.82         | 1.15         | 3.17E-02 | JMJD8     | 25.55  | 23.55  | NA                     | bivalent      |
| chr16 | 1,146,161   | 1,147,799   | 7         | 1.80         | 0.81         | 2.62E-02 | C1QTNF8   | 0.11   | 0.01   | NA                     | NA            |
| chr16 | 3,624,392   | 3,630,429   | 9         | 2.21         | 0.65         | 1.06E-02 | NLRC3     | 0.34   | 0.74   | NA                     | NA            |
| chr16 | 4,737,300   | 4,740,171   | 8         | 5.50         | 1.63         | 6.99E-03 | NUDT16L1  | 9.36   | 13.47  | NA                     | bivalent      |
| chr16 | 8,966,801   | 8,968,385   | 5         | 0.54         | 0.91         | 1.59E-02 | CARHSP1   | 119.30 | 127.85 | NA                     | bivalent      |
| chr16 | 33,964,251  | 33,965,655  | 6         | 3.22         | 1.66         | 4.11E-02 | MIR1826   | NA     | NA     | NA                     | NA            |
| chr16 | 46,781,587  | 46,785,471  | 5         | 2.34         | 1.14         | 3.17E-02 | MYLK3     | 2.09   | 3.57   | NA                     | NA            |
| chr16 | 69,140,090  | 69,141,044  | 5         | 0.39         | 0.14         | 3.17E-02 | HAS3      | 16.41  | 16.05  | NA                     | bivalent      |
| chr16 | 88,720,466  | 88,722,655  | 6         | 2.98         | 1.15         | 8.66E-03 | CYBA      | 88.78  | 116.04 | NA                     | bivalent      |
| chr16 | 88,729,181  | 88,730,291  | 6         | 0.33         | 0.13         | 4.11E-02 | MGC23284  | 1.52   | 1.41   | NA                     | bivalent      |
| chr16 | 88,729,181  | 88,730,291  | 6         | 0.33         | 0.13         | 4.11E-02 | MVD       | 53.87  | 27.86  | NA                     | bivalent      |
| chr16 | 88,935,300  | 88,938,017  | 5         | 3.06         | 1.06         | 7.94E-03 | PABPN1L   | 0.01   | 0.49   | NA                     | NA            |
| chr17 | 681,524     | 683,907     | 5         | 1.09         | 1.72         | 3.17E-02 | RNMTL1    | 12.13  | 11.44  | NA                     | bivalent      |
| chr17 | 1,173,263   | 1,175,048   | 6         | 0.59         | 0.24         | 1.52E-02 | BHLHA9    | 0.01   | 0.12   | NA                     | bivalent      |
| chr17 | 1,953,942   | 1,957,387   | 11        | 0.42         | 0.18         | 1.51E-02 | MIR132    | NA     | NA     | NA                     | bivalent      |
| chr17 | 1,953,942   | 1,957,387   | 11        | 0.42         | 0.18         | 1.51E-02 | MIR212    | NA     | NA     | NA                     | NA            |
| chr17 | 1,953,942   | 1,957,387   | 11        | 0.42         | 0.18         | 1.51E-02 | HIC1      | 0.23   | 0.31   | NA                     | NA            |
| chr17 | 4,642,789   | 4,644,276   | 5         | 0.40         | 0.16         | 3.17E-02 | ZMYND15   | 0.45   | 0.43   | NA                     | NA            |
| chr17 | 4,642,789   | 4,644,276   | 5         | 0.40         | 0.16         | 3.17E-02 | CXCL16    | 0.96   | 1.17   | NA                     | bivalent      |
| chr17 | 6,538,465   | 6,540,792   | 5         | 2.37         | 1.07         | 1.59E-02 | TXNDC17   | 211.98 | 131.91 | NA                     | bivalent      |
| chr17 | 7,321,160   | 7,322,532   | 5         | 0.55         | 0.28         | 1.59E-02 | SPEM1     | NA     | NA     | NA                     | NA            |
| chr17 | 61,779,439  | 61,781,803  | 5         | 1.78         | 0.85         | 1.59E-02 | LIMD2     | 40.56  | 31.24  | NA                     | bivalent      |
| chr17 | 76,185,107  | 76,189,400  | 5         | 5.37         | 2.01         | 3.17E-02 | TK1       | 33.67  | 35.91  | NA                     | bivalent      |
| chr17 | 79,632,662  | 79,636,336  | 7         | 0.82         | 0.43         | 2.62E-02 | C17orf90  | 2.09   | 4.8    | EB                     | bivalent      |
| chr19 | 460,220     | 462,557     | 6         | 0.35         | 0.13         | 4.33E-03 | SHC2      | 31.14  | 52.46  | NA                     | NA            |
| chr19 | 1,445,789   | 1,446,505   | 5         | 0.49         | 0.13         | 3.17E-02 | APC2      | 0.01   | 0.18   | NA                     | bivalent      |



|       |             |             |   |      |      |          |            |        |        |    |          |
|-------|-------------|-------------|---|------|------|----------|------------|--------|--------|----|----------|
| chr19 | 1,752,858   | 1,754,892   | 9 | 0.46 | 0.16 | 7.77E-03 | ONECUT3    | NA     | NA     | NA | NA       |
| chr19 | 1,819,539   | 1,822,000   | 5 | 4.56 | 1.39 | 7.94E-03 | MIR1909    | NA     | NA     | NA | NA       |
| chr19 | 2,426,943   | 2,427,940   | 6 | 0.36 | 0.12 | 4.11E-02 | TIMM13     | 110.33 | 123.12 | NA | bivalent |
| chr19 | 8,808,334   | 8,809,121   | 5 | 1.29 | 0.68 | 7.94E-03 | ACTL9      | NA     | NA     | NA | NA       |
| chr19 | 9,200,143   | 9,203,433   | 5 | 0.66 | 1.21 | 3.17E-02 | OR1M1      | NA     | NA     | NA | NA       |
| chr19 | 11,311,103  | 11,313,267  | 5 | 1.52 | 0.90 | 7.94E-03 | KANK2      | 16.41  | 15.99  | NA | bivalent |
| chr19 | 12,899,651  | 12,901,132  | 5 | 0.41 | 0.12 | 3.17E-02 | JUNB       | 7.28   | 9.84   | NA | bivalent |
| chr19 | 50,920,365  | 50,921,802  | 7 | 1.09 | 0.37 | 4.08E-03 | SPIB       | 3.84   | 3.81   | NA | bivalent |
| chr19 | 51,300,818  | 51,303,717  | 6 | 4.41 | 1.61 | 1.52E-02 | SNORD88B   | NA     | NA     | NA | bivalent |
| chr19 | 56,137,245  | 56,141,036  | 5 | 0.97 | 1.73 | 3.17E-02 | ZNF784     | 3.50   | 3.07   | NA | bivalent |
| chr2  | 130,691,033 | 130,692,012 | 5 | 0.36 | 0.15 | 3.17E-02 | LOC389033  | 0.17   | 0.61   | NA | bivalent |
| chr2  | 198,314,641 | 198,316,307 | 5 | 0.42 | 0.82 | 3.17E-02 | COQ10B     | 1.35   | 2.77   | EB | bivalent |
| chr2  | 241,505,326 | 241,506,132 | 5 | 0.38 | 0.17 | 1.59E-02 | RNPEPL1    | 5.81   | 6.76   | NA | NA       |
| chr2  | 241,563,008 | 241,564,722 | 5 | 1.06 | 0.56 | 3.17E-02 | GPR35      | 0.68   | 0.49   | NA | NA       |
| chr2  | 242,089,281 | 242,090,099 | 5 | 0.33 | 0.10 | 1.59E-02 | PPP1R7     | 26.85  | 45.45  | NA | bivalent |
| chr2  | 242,089,281 | 242,090,099 | 5 | 0.33 | 0.10 | 1.59E-02 | PASK       | 30.18  | 21.65  | NA | bivalent |
| chr2  | 242,500,579 | 242,502,855 | 5 | 2.66 | 1.37 | 3.17E-02 | BOKAS      | NA     | NA     | NA | NA       |
| chr20 | 20,347,751  | 20,350,563  | 5 | 0.41 | 0.13 | 3.17E-02 | INSM1      | 0.28   | 1.66   | EB | bivalent |
| chr20 | 21,377,635  | 21,378,549  | 6 | 0.46 | 0.15 | 2.16E-03 | NKX2-4     | NA     | NA     | NA | NA       |
| chr20 | 48,770,151  | 48,770,857  | 5 | 0.35 | 0.15 | 1.59E-02 | EM189-UBE2 | NA     | NA     | NA | bivalent |
| chr20 | 48,770,151  | 48,770,857  | 5 | 0.35 | 0.15 | 1.59E-02 | TMEM189    | 30.52  | 37.57  | NA | NA       |
| chr20 | 61,150,952  | 61,152,381  | 5 | 2.34 | 1.00 | 7.94E-03 | MIR1-1     | NA     | NA     | NA | bivalent |
| chr20 | 61,150,952  | 61,152,381  | 5 | 2.34 | 1.00 | 7.94E-03 | C20orf200  | 3.61   | 5.23   | NA | bivalent |
| chr20 | 61,159,408  | 61,162,340  | 7 | 2.07 | 0.85 | 2.33E-03 | MIR133A2   | NA     | NA     | NA | NA       |
| chr20 | 62,663,524  | 62,665,155  | 5 | 2.99 | 1.93 | 1.59E-02 | NCRNA00176 | 0.23   | 0.49   | NA | NA       |
| chr22 | 19,134,809  | 19,138,426  | 5 | 0.45 | 0.24 | 1.59E-02 | DGCR14     | 7.95   | 9.72   | NA | bivalent |
| chr22 | 25,421,713  | 25,424,299  | 5 | 0.70 | 0.39 | 3.17E-02 | KIAA1671   | 35.42  | 33.88  | NA | NA       |
| chr22 | 39,155,631  | 39,156,825  | 5 | 1.70 | 0.96 | 3.17E-02 | SUN2       | 4.91   | 5.47   | NA | bivalent |
| chr22 | 46,398,043  | 46,402,130  | 6 | 2.13 | 1.22 | 4.11E-02 | LOC730668  | 1.58   | 1.35   | NA | NA       |
| chr22 | 50,054,187  | 50,057,517  | 5 | 2.78 | 1.11 | 3.17E-02 | C22orf34   | 0.01   | 0.18   | NA | NA       |
| chr22 | 50,350,856  | 50,353,222  | 5 | 1.43 | 0.69 | 1.59E-02 | PIM3       | 18.90  | 22.88  | NA | NA       |
| chr22 | 50,528,388  | 50,529,266  | 6 | 2.11 | 0.86 | 2.60E-02 | MOV10L1    | NA     | NA     | NA | NA       |
| chr22 | 50,528,388  | 50,529,266  | 6 | 2.11 | 0.86 | 2.60E-02 | MLC1       | NA     | NA     | NA | NA       |
| chr22 | 50,623,336  | 50,624,295  | 5 | 0.74 | 0.24 | 3.17E-02 | TRABD      | 23.30  | 16.11  | NA | bivalent |
| chr3  | 52,090,259  | 52,092,251  | 5 | 0.43 | 0.10 | 3.17E-02 | DUSP7      | 4.96   | 8.18   | NA | bivalent |
| chr3  | 52,524,840  | 52,526,356  | 5 | 3.84 | 1.50 | 3.17E-02 | STAB1      | 37.91  | 25.15  | NA | NA       |
| chr3  | 127,308,178 | 127,310,922 | 5 | 0.47 | 0.22 | 3.17E-02 | TPRA1      | 21.77  | 16.79  | NA | bivalent |
| chr3  | 127,390,433 | 127,392,355 | 6 | 0.52 | 0.22 | 4.11E-02 | ABTB1      | 5.53   | 5.9    | NA | bivalent |
| chr3  | 128,223,721 | 128,226,395 | 5 | 2.27 | 0.94 | 7.94E-03 | LOC90246   | 0.01   | 0.37   | NA | NA       |
| chr3  | 160,170,249 | 160,171,014 | 5 | 2.91 | 1.23 | 3.17E-02 | TRIM59     | 52.12  | 54.18  | NA | bivalent |
| chr3  | 197,807,144 | 197,808,733 | 6 | 0.41 | 0.19 | 8.66E-03 | LOC348840  | 2.03   | 2.34   | NA | bivalent |
| chr4  | 5,991,307   | 5,996,369   | 8 | 2.24 | 1.02 | 6.99E-03 | C4orf50    | NA     | NA     | NA | NA       |
| chr4  | 8,194,514   | 8,197,813   | 6 | 0.66 | 0.37 | 1.52E-02 | SH3TC1     | 0.11   | 0.49   | NA | NA       |
| chr6  | 160,768,459 | 160,769,651 | 5 | 0.45 | 0.17 | 3.17E-02 | SLC22A3    | 2.37   | 1.6    | NA | bivalent |
| chr7  | 1,121,712   | 1,123,937   | 6 | 2.47 | 1.42 | 4.11E-02 | GPER       | 0.01   | 0.18   | NA | bivalent |
| chr7  | 1,598,998   | 1,599,869   | 6 | 1.59 | 0.70 | 1.52E-02 | TMEM184A   | 4.51   | 5.04   | NA | NA       |
| chr7  | 5,111,792   | 5,112,381   | 5 | 0.40 | 0.16 | 3.17E-02 | LOC389458  | NA     | NA     | NA | NA       |
| chr7  | 23,053,043  | 23,053,937  | 5 | 0.40 | 0.18 | 3.17E-02 | FAM126A    | 21.49  | 26.87  | NA | bivalent |
| chr7  | 44,184,941  | 44,186,290  | 5 | 0.48 | 0.11 | 3.17E-02 | MYL7       | 11.68  | 7.5    | NA | bivalent |
| chr7  | 100,491,753 | 100,495,072 | 6 | 0.40 | 0.15 | 1.52E-02 | ACHE       | 5.36   | 8.55   | NA | bivalent |
| chr7  | 129,410,506 | 129,412,947 | 5 | 0.79 | 0.34 | 1.59E-02 | MIR182     | NA     | NA     | NA | bivalent |

|      |             |             |   |      |      |          |            |        |       |    |          |
|------|-------------|-------------|---|------|------|----------|------------|--------|-------|----|----------|
| chr8 | 145,753,758 | 145,754,635 | 5 | 0.39 | 0.13 | 7.94E-03 | LRRC24     | 4.63   | 4.86  | NA | bivalent |
| chr8 | 145,753,758 | 145,754,635 | 5 | 0.39 | 0.13 | 7.94E-03 | MGC70857   | NA     | NA    | NA | bivalent |
| chr9 | 4,792,422   | 4,793,992   | 5 | 0.43 | 0.18 | 1.59E-02 | RCL1       | 26.12  | 26.51 | NA | bivalent |
| chr9 | 82,185,134  | 82,188,283  | 5 | 0.46 | 0.17 | 3.17E-02 | TLE4       | 18.61  | 22.08 | NA | bivalent |
| chr9 | 101,983,963 | 101,984,769 | 5 | 0.38 | 0.18 | 7.94E-03 | SEC61B     | 145.92 | 145.5 | NA | bivalent |
| chr9 | 101,983,963 | 101,984,769 | 5 | 0.38 | 0.18 | 7.94E-03 | ALG2       | 24.14  | 36.84 | NA | bivalent |
| chr9 | 127,112,547 | 127,115,312 | 5 | 2.36 | 1.16 | 3.17E-02 | OC10012903 | 12.47  | 10.45 | NA | NA       |
| chr9 | 136,448,864 | 136,450,776 | 5 | 0.92 | 0.51 | 3.17E-02 | FAM163B    | 0.01   | 0.25  | NA | NA       |
| chr9 | 139,637,827 | 139,640,409 | 6 | 3.31 | 0.98 | 8.66E-03 | LCN10      | 0.62   | 0.37  | NA | NA       |
| chr9 | 139,837,245 | 139,841,195 | 8 | 2.49 | 0.89 | 3.79E-02 | C8G        | 0.11   | 0.43  | NA | NA       |
| chr9 | 139,837,245 | 139,841,195 | 8 | 2.49 | 0.89 | 3.79E-02 | FBXW5      | 34.58  | 26.94 | NA | NA       |
| chr9 | 140,116,040 | 140,118,140 | 5 | 0.44 | 0.18 | 3.17E-02 | C9orf169   | 1.24   | 1.66  | NA | NA       |
| chr9 | 140,116,040 | 140,118,140 | 5 | 0.44 | 0.18 | 3.17E-02 | RNF208     | 6.26   | 7.69  | NA | NA       |
| chr9 | 140,116,040 | 140,118,140 | 5 | 0.44 | 0.18 | 3.17E-02 | LOC643596  | 0.45   | 0.55  | NA | NA       |
| chr9 | 140,167,077 | 140,168,481 | 5 | 3.70 | 1.75 | 3.17E-02 | C9orf167   | 4.46   | 4.24  | NA | bivalent |
| chr9 | 140,196,040 | 140,196,866 | 5 | 0.37 | 0.15 | 1.59E-02 | NRARP      | 20.08  | 29.76 | NA | NA       |

Supplementary Table S7. The top four Gene Ontology enriched terms for DhMR-associated genes.

| Category     | Term         | Count | %     | Fold Enrichment | p-value  | Gene symbols                                                                                                                                                                                                                                                                                                                                                                                                                                                                                                                                                                                                                                                                                                                                                                                                                                                                                                                                                                                                |
|--------------|--------------|-------|-------|-----------------|----------|-------------------------------------------------------------------------------------------------------------------------------------------------------------------------------------------------------------------------------------------------------------------------------------------------------------------------------------------------------------------------------------------------------------------------------------------------------------------------------------------------------------------------------------------------------------------------------------------------------------------------------------------------------------------------------------------------------------------------------------------------------------------------------------------------------------------------------------------------------------------------------------------------------------------------------------------------------------------------------------------------------------|
| GO MF        | GO:0030528~  | 82    | 10.83 | 1.53            | 8.23E-05 | TAF1C, HMX2, NR6A1, CNOT3, PAX3, GATA1, BRPF1, HOXC9, PAX7, MED26, SND1, NR2F6, SPIB, OLIG2, USP16, CIITA, EGR3, SNAPC4, MTA1, ARNTL, HMGA1, JMY, ZNF500, ZNF236, PFDN6, HES4, BHLHA9, MED8, HIPK2, DPRX, MED18, SIX1, CAND2, VGLL3, THOC1, CNBP, ONECUT1, GLIS2, TRRAP, CALR, SOX8, ZNF169, T, ZNF323, HOXA3, HOXA4, HAND1, C11ORF9, LHX1, TSC22D4, POU2F3, HOXA10, POU3F3, MLXIP, FOXD2, NFATC3, ETV5, SIM1, ZBTB48, FOXL2, UTF1, CEBPE, TAF8, TP53BP1, SAP18, LMX1A, NEUROG3, FOXP3, STAT3, USF2, CDKN1C, MED31, HOXB3, HOXB4, HOXB8, PHB2, EBF2, MLX, FOXE1, TCEB1, KDM4A, KLF4                                                                                                                                                                                                                                                                                                                                                                                                                         |
| GO MF        | GO:0043565~  | 40    | 5.28  | 1.86            | 2.39E-04 | HMX2, ONECUT1, NR6A1, PAX3, TERF2IP, GATA1, T, HOXC9, HOXA3, HOXA4, HAND1, LHX1, POU2F3, PAX7, HOXA10, NR2F6, POU3F3, SPIB, OLIG2, FOXD2, ETV5, TERT, CIITA, FOXL2, CEBPE, TP53BP1, MTA1, MCM2, LMX1A, FOXP3, HMGA1, STAT3, USF2, HOXB3, HOXB4, HOXB8, SIX1, DPRX, FOXE1, KLF4<br>HMX2, CNOT3, CBX8, RCBTB1, GATA1, BRPF1, HOXC9, MED26, SND1, OLIG2, CRY1, FIZ1, CIITA, RBL1, ARNTL, ZNF500, ZNF236, HES4, BHLHA9, MED18, DPRX, RDBP, VGLL3, CNBP, ONECUT1, GPBP1L1, SETD1B, TRRAP, ZNF514, DIDO1, SOX8, T, ZNF323, HOXA3, HOXA4, LHX1, HOXA10, ZBTB48, UTF1, ZNF625, TP53BP1, TAF8, SAP18, NEUROG3, FOXP3, ZBTB44, USF2, HOXB3, NOTCH3, HOXB4, HOXB8, MLX, EBF2, KLF4, ZNF410, TAF1C, ZFP41, NR6A1, PAX3, ZNF205, ZNF678, ANG, PAX7, RTF1, NR2F6, SPIB, USP16, EGR3, KHDRBS3, SNAPC4, CDK9, MCM2, HMGA1, CCNL2, MED8, HIPK2, CAND2, ZNF467, GLIS2, ZNF169, HAND1, TSC22D4, POU2F3, MLXIP, FOXD2, NFATC3, SIM1, FOXL2, CEBPE, ZNF667, LMX1A, STAT3, ZNF664, MED31, PHB2, FOXE1, KDM4C, TCEB1, KDM4A, RBM16 |
| GO BP        | GO:0006350~  | 100   | 13.21 | 1.36            | 8.86E-04 | HMX2, GDF6, GMCL1L, PASK, CNOT3, CBX8, RCBTB1, GATA1, BRPF1, HOXC9, MED26, SND1, OLIG2, CRY1, FIZ1, CIITA, RBL1, MTA1, ARNTL, ZNF500, PTHLH, ZNF236, HES4, BHLHA9, DPRX, SIX1, MED18, RDBP, VGLL3, CNBP, ONECUT1, GPBP1L1, SETD1B, TRRAP, ZNF514, CALR, SOX8, T, IRAK3, ZNF323, HOXA3, HOXA4, LHX1, HOXA10, ZBTB48, UTF1, ZNF625, TAF8, TP53BP1, RFX7, SAP18, NEUROG3, FOXP3, ZBTB44, SFMBT1, USF2, HOXB3, NOTCH3, CDKN1C, HOXB4, CDKN1B, HOXB8, MLX, EBF2, KLF4, ZNF410, ZFP41, NR6A1, PAX3, TERF2IP, ZNF205, ZNF678, PAX7, RTF1, NR2F6, RHOA, SPIB, USP16, EGR3, KHDRBS3, SNAPC4, TLE6, CDK9, MCM2, HMGA1, SIGIRR, JMY, CCNL2, MED8, HIPK2, CAND2, ZNF467, GLIS2, TNFRSF4, ZNF169, HAND1, C11ORF9, TSC22D4, POU2F3, POU3F3, MLXIP, FOXD2, NFATC3, ETV5, SIM1, FOXL2, CEBPE, ZNF667, LMX1A, STAT3, ZNF664, MED31, RPS6KA4, PHB2, FOXE1, KDM4C, TCEB1, KDM4A, RBM15                                                                                                                                         |
| GO BP        | GO:0045449~  | 119   | 15.72 | 1.31            | 1.10E-03 | ALOX15, TBXAS1, PTGIS, PTGDS, PDPN, RNPEPL1, PLA2G4C, DEGS1                                                                                                                                                                                                                                                                                                                                                                                                                                                                                                                                                                                                                                                                                                                                                                                                                                                                                                                                                 |
| GO BP        | GO:0033559~  | 8     | 1.06  | 4.48            | 1.87E-03 | HMX2, FOXL2, USH1G, TH, HOXB3, HOXB4, SPRY2, HOXA3, HOXC9, HOXA4, HOXB8, SIX1, FOXE1                                                                                                                                                                                                                                                                                                                                                                                                                                                                                                                                                                                                                                                                                                                                                                                                                                                                                                                        |
| GO BP        | GO:0048562~  | 13    | 1.72  | 2.79            | 2.42E-03 | CDKN1C, CCND1, CASP3, CDKN1B, CABLES2                                                                                                                                                                                                                                                                                                                                                                                                                                                                                                                                                                                                                                                                                                                                                                                                                                                                                                                                                                       |
| GO MF        | GO:0016538~  | 5     | 0.66  | 8.28            | 2.56E-03 | RET, FOXL2, HMX2, NF2, USH1G, TH, PAX3, GREM1, HOXB3, T, HOXB4, SPRY2, HOXA3, HOXC9, HOXA4, HAND1, LHX1, HOXB8, SIX1, FOXE1, HOXA10, KLF4                                                                                                                                                                                                                                                                                                                                                                                                                                                                                                                                                                                                                                                                                                                                                                                                                                                                   |
| GO BP        | GO:0048598~  | 22    | 2.91  | 2.05            | 2.65E-03 | HMX2, FOXL2, USH1G, TH, HOXB3, T, HOXB4, SPRY2, HOXA3, HOXC9, HAND1, HOXA4, HOXB8, SIX1, FOXE1                                                                                                                                                                                                                                                                                                                                                                                                                                                                                                                                                                                                                                                                                                                                                                                                                                                                                                              |
| GO BP        | GO:0048568~  | 15    | 1.98  | 2.49            | 2.88E-03 | NDUFS6, CASP3, HTRA2, GPR37, SLC6A3, NDUFA6, SDHC, TH, NDUFA7, SLC18A2, UBE2J2, NDUFA1                                                                                                                                                                                                                                                                                                                                                                                                                                                                                                                                                                                                                                                                                                                                                                                                                                                                                                                      |
| KEGG pathway | hsa05012:Par | 12    | 1.59  | 2.68            | 4.70E-03 | HMX2, NR6A1, PAX3, GATA1, HOXC9, PAX7, NR2F6, SPIB, OLIG2, EGR3, SNAPC4, MTA1, ARNTL, HMGA1, ZNF500, ZNF236, SIX1, DPRX, CNBP, ONECUT1, SOX8, ZNF169, T, ZNF323, HOXA3, HOXA4, C11ORF9, HAND1, TSC22D4, LHX1, POU2F3, HOXA10, POU3F3, FOXD2, ETV5, NFATC3, SIM1, ZBTB48, FOXL2, CEBPE, NEUROG3, LMX1A, FOXP3, USF2, STAT3, HOXB3, HOXB4, HOXB8, MLX, FOXE1, KLF4                                                                                                                                                                                                                                                                                                                                                                                                                                                                                                                                                                                                                                            |
| GO MF        | GO:0003700~  | 51    | 6.74  | 1.47            | 5.09E-03 | ALOX15, TBXAS1, PTGIS, PTGDS, PDPN, RNPEPL1, PLA2G4C                                                                                                                                                                                                                                                                                                                                                                                                                                                                                                                                                                                                                                                                                                                                                                                                                                                                                                                                                        |
| GO BP        | GO:0006690~  | 7     | 0.92  | 4.25            | 5.64E-03 | PTHLH, HOXB3, HOXB4, BMP1, HOXC9, HOXA3, HOXA4, HOXB8, SIX1, ANKRD11, IDUA                                                                                                                                                                                                                                                                                                                                                                                                                                                                                                                                                                                                                                                                                                                                                                                                                                                                                                                                  |
| GO BP        | GO:0048705~  | 11    | 1.45  | 2.80            | 5.83E-03 | ALOX15, TBXAS1, PTGIS, PTGDS, RNPEPL1, DEGS1                                                                                                                                                                                                                                                                                                                                                                                                                                                                                                                                                                                                                                                                                                                                                                                                                                                                                                                                                                |
| GO BP        | GO:0006636~  | 6     | 0.79  | 5.04            | 6.16E-03 | GNAT1, NF2, OPR1, ANAPC1, PXX, TNNI3, FOXP3, TNFRSF4, SIGIRR, CDKN1C, PTHLH, IRAK3, SPRY2, CASP3, CYP27B1, CDKN1B, PSMB6, DUSP16, PSMC1, ZFYVE28, DUSP9, OPRD1                                                                                                                                                                                                                                                                                                                                                                                                                                                                                                                                                                                                                                                                                                                                                                                                                                              |
| GO BP        | GO:0044092~  | 22    | 2.91  | 1.88            | 6.99E-03 | HOXB3, HOXA3, SIX1, FOXE1                                                                                                                                                                                                                                                                                                                                                                                                                                                                                                                                                                                                                                                                                                                                                                                                                                                                                                                                                                                   |
| GO BP        | GO:0030878~  | 4     | 0.53  | 9.51            | 7.38E-03 | HMX2, XRCC3, GATA1, BRPF1, HOXC9, MED26, BAHCC1, OLIG2, CRY1, CIITA, MTA1, TOPBP1, ARNTL, TOX4, ZNF500, ZNF236, HES4, BHLHA9, DPRX, SIX1, CNBP, HMGB3, ONECUT1, GPBP1L1, ZNF514, CALR, SOX8, T, ZNF323, PEG10, HOXA3, HOXA4, LHX1, HOXA10, ZBTB48, ZNF625, TAF8, TP53BP1, RFX7, NEUROG3, FOXP3, ZBTB44, USF2, HOXB3, HOXB4, HOXB8, POLD1, MLX, EBF2, PCNA, KLF4, BTBD11, ZNF410, TAF1C, ZFP41, NR6A1, PAX3, TERF2IP, ZNF205, ZNF678, ANG, PAX7, RTF1, NR2F6, SPIB, TERT, ZFP36, EGR3, SNAPC4, CDK9, MCM2, HMGA1, XPC, CDK2AP1, THOC1, H1FNT, C17ORF70, ZNF467, WRNIP1, GLIS2, ZNF169, C11ORF9, HAND1, TSC22D4, POU2F3, POU3F3, MLXIP, FOXD2, NFATC3, ETV5, FEN1, SIM1, BAHD1, FOXL2, CEBPE, HIST1H2BG, ZNF667, LMX1A, STAT3, ZNF664, SON, ZBED4, FOXE1, REPIN1                                                                                                                                                                                                                                              |
| GO MF        | GO:0003677~  | 104   | 13.74 | 1.26            | 8.07E-03 | NDUFS6, CYBA, NDUFA6, NDUFA7, MIOX, GMPR, NDUFA1, CYB561, DHDH                                                                                                                                                                                                                                                                                                                                                                                                                                                                                                                                                                                                                                                                                                                                                                                                                                                                                                                                              |
| GO MF        | GO:0016651~  | 9     | 1.19  | 3.05            | 9.03E-03 |                                                                                                                                                                                                                                                                                                                                                                                                                                                                                                                                                                                                                                                                                                                                                                                                                                                                                                                                                                                                             |
